# Supplementary material for: Liquid adsorption at surfaces patterned with cylindrical nano-cavities
Source: Royal Society of Chemistry journal article supplement (doi:10.1039/c3sm51188j), 2013-01-01
Supplement: c3sm51188j.pdf [file c3sm51188j.pdf]

## Liquid Adsorption at Surfaces Patterned with Cylindrical Nano-Cavities.

### *Supporting Material*

*Oleg Gang*<sup>1\*</sup>, *Antonio Checco*<sup>2</sup>, *Tommy Hofmann*<sup>3</sup>, *Du Yeol Ryu*<sup>4</sup>, *Thomas P. Russell*<sup>5</sup> and  
*Benjamin M. Ocko*<sup>2\*</sup>

<sup>1</sup> Center for Functional Nanomaterials, Brookhaven National Laboratory, Upton, NY 11973 USA

<sup>2</sup> Condensed Matter Physics and Material Science Department, Brookhaven National Laboratory,  
Upton, NY 11973 USA

<sup>3</sup> Helmholtz-Zentrum Berlin für Materialien und Energie GmbH, Hahn-Meitner-Platz 1, D-14109  
Berlin, Germany

<sup>4</sup> Department of Chemical and Biomolecular Engineering, Yonsei University, 50 Yonsei-ro,  
Seodaemun-gu, Seoul 120-749, Korea.

<sup>5</sup> Department of Polymer Science & Engineering, University of Massachusetts, Amherst, MA  
01003, USA

\*ogang@bnl.gov; ocko@bnl.gov

### Description of X-ray reflectivity (XR) fit procedure

In the initial fitting procedure, we varied the thickness and the electron density of box 3, which corresponds to liquid coated walls. While, in principle, this would permit one to obtain an independent measure of amount of liquid adsorbed at the bottom of the cavity and on the walls, we found that for  $\Delta T > 8\text{K}$  this fit procedure was relatively insensitive to the amount of liquid in box 3. For this reason, we fixed the electron density in this box in subsequent fits according to the calculated wall adsorption, as estimated below. With this approach, the fit provided information on the PFMC adsorption at the bottom of the cavity (box 2) and on the top surface (box 4).

The wetting layer on the top surface was described by a box whose thickness was a fit parameter with an electron density constrained to  $\rho_4 / \rho_{PFMC} = 0.63$  during the cavity filling process, and it was a free, albeit constrained, fit parameter within the range 0.63 to 1.0 after the cavities were filled. This approach is based on assumption that liquid layer covers the entire area between cavities (63% of the total surface) in a planar manner as long as the cavities were not filled. However, the wetting layer gradually becomes laterally uniform with  $\rho_4$  approaches  $\rho_{PFMC}$  at small  $\Delta T$  after the cavities were filled.

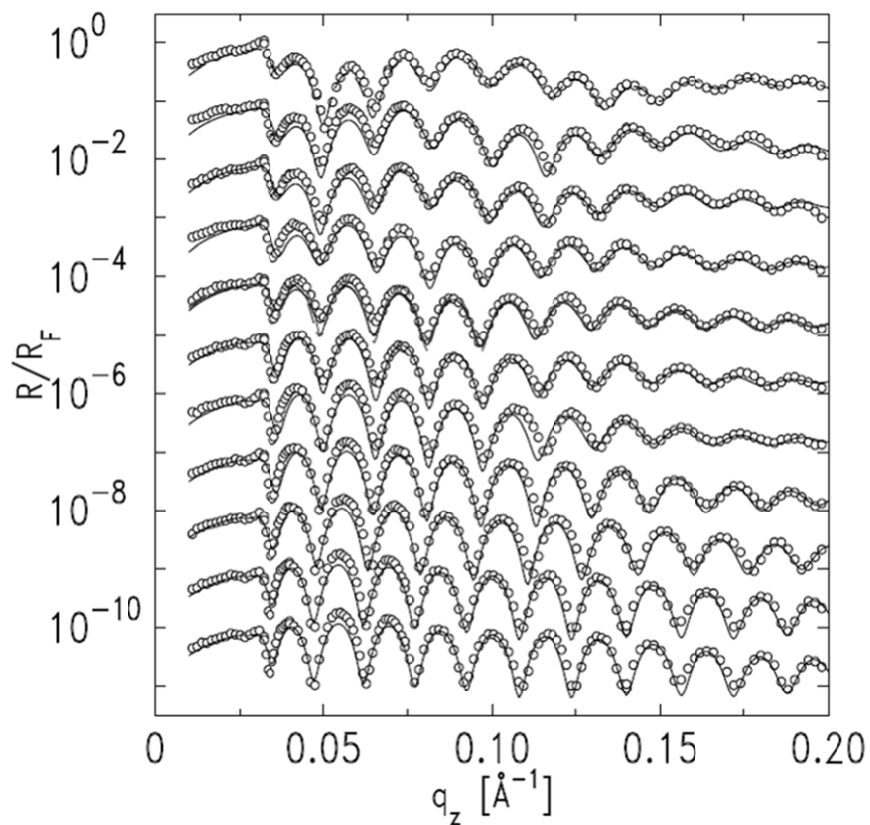

Fig. S1. Representative X-ray reflectivity profiles (circles) obtained from dry patterned surface (top), and for various  $\Delta T$  in the presence of saturated PFMC vapor; shown XR profiles corresponds to the dry state (top curve) and to the wet states (second from the top and down are for  $\Delta T=$  15K, 11.1K, 8.2K, 4.2K, 2.5K, 1.1K, 0.7K, 0.415K, 0.115K, 0.024K respectively). The solid lines are obtained from fitting the model electron density profile to the XR data, as described in the text.
